# Supplementary material for: Zinc halide template effects on the construction of [1 + 1] flexible Schiff-base macrocyclic complexes having pendant-armed dialdehyde components
Source: Royal Society of Chemistry journal article supplement (doi:10.1039/c4dt00605d), 2014-01-01
Supplement: c4dt00605d1.pdf [file c4dt00605d1.pdf]

## Zinc halide template effects on the construction of [1+1] flexible Schiff-base macrocyclic complexes having novel pendant-armed dialdehyde components

Hui-Qing Chen, Kun Zhang, Chao Jin, Wei Huang\*

*State Key Laboratory of Coordination Chemistry, Nanjing National Laboratory of Microstructures, School of Chemistry and Chemical Engineering, Nanjing University, Nanjing 210093, P. R. China*

### Electronic Supporting Information

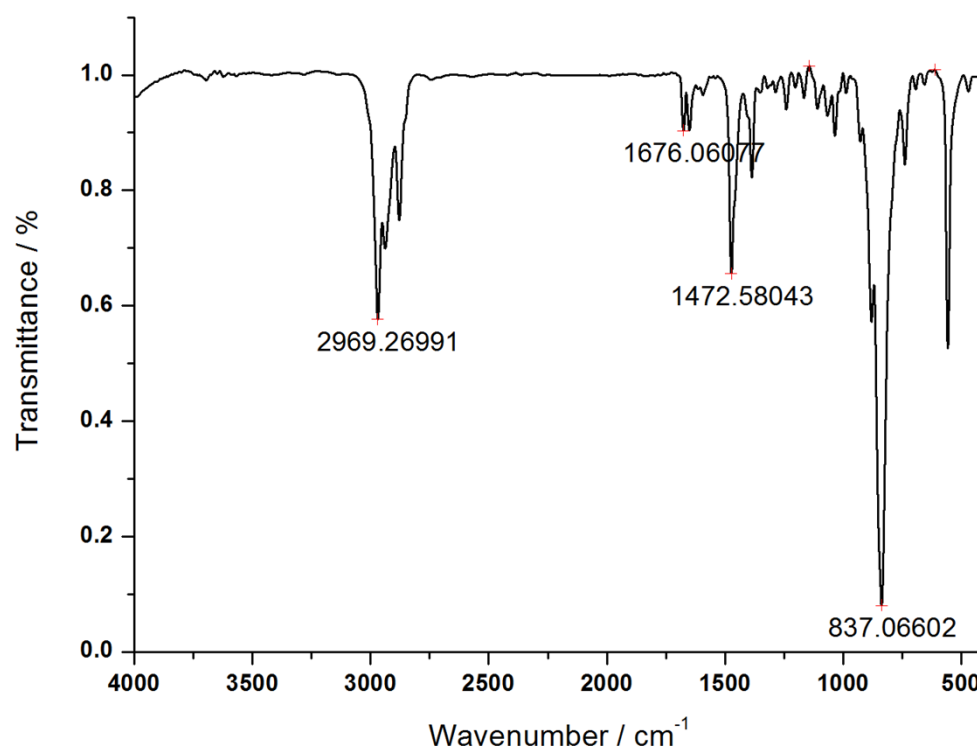

**Fig. S11.** FT-IR spectrum of **1a**.

---

\* Corresponding author. Tel.: +86-25-83686526; Fax: +86-25-83314502  
E-mail address: [whuang@nju.edu.cn](mailto:whuang@nju.edu.cn).

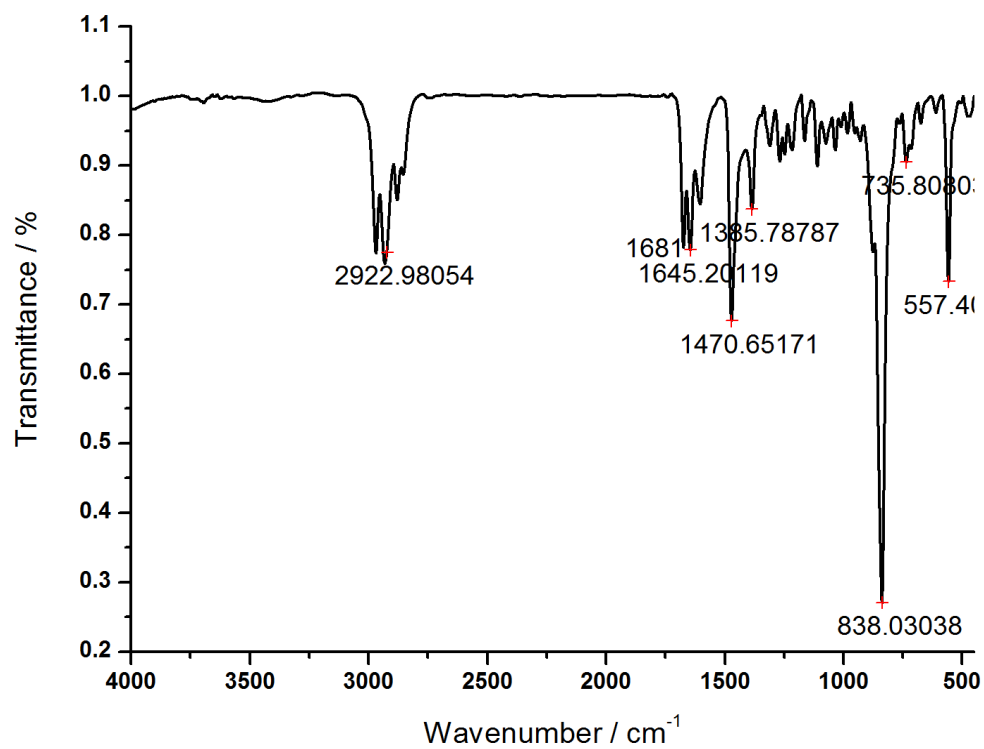

**Fig. SI2.** FT-IR spectrum of **1b**.

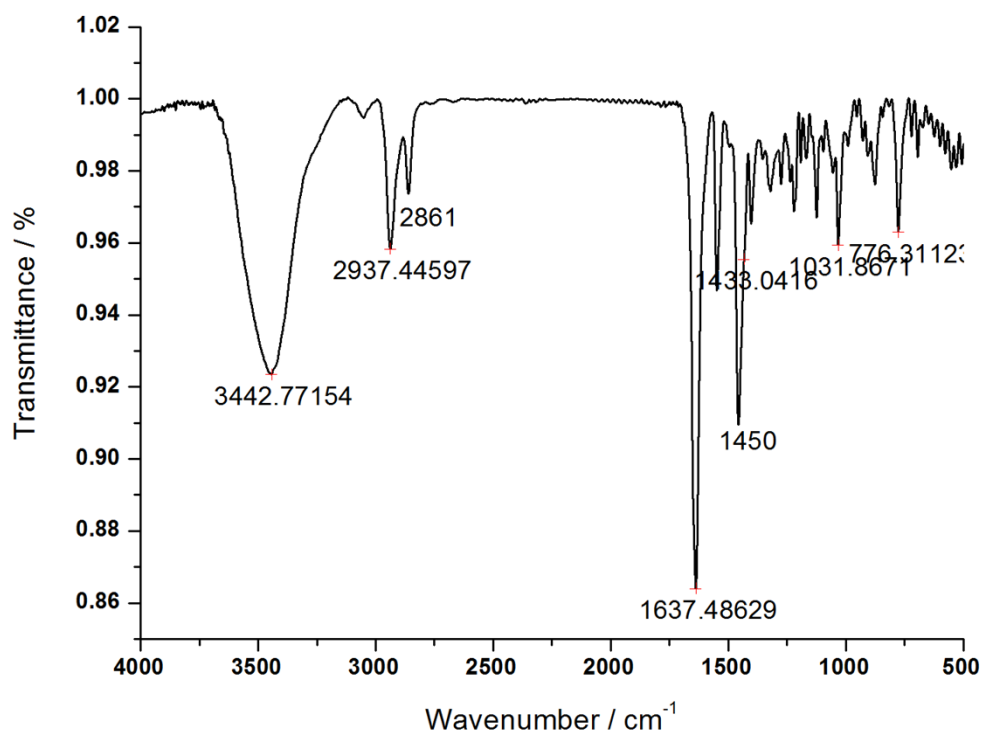

**Fig. SI3.** FT-IR spectrum of **2a**.

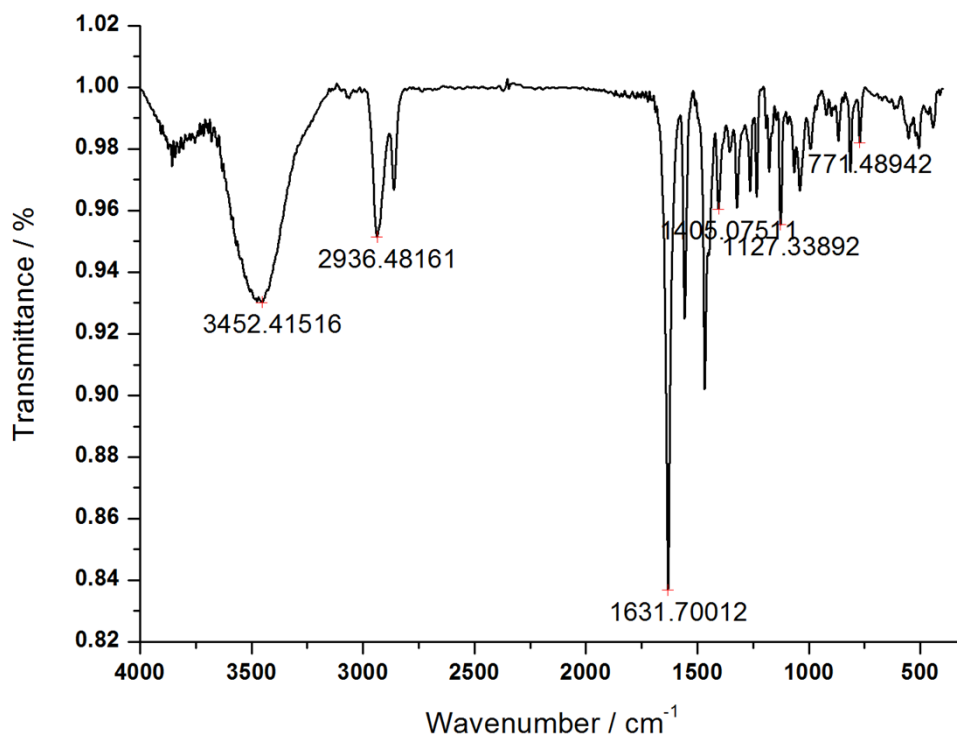

Fig. SI4. FT-IR spectrum of 2b.

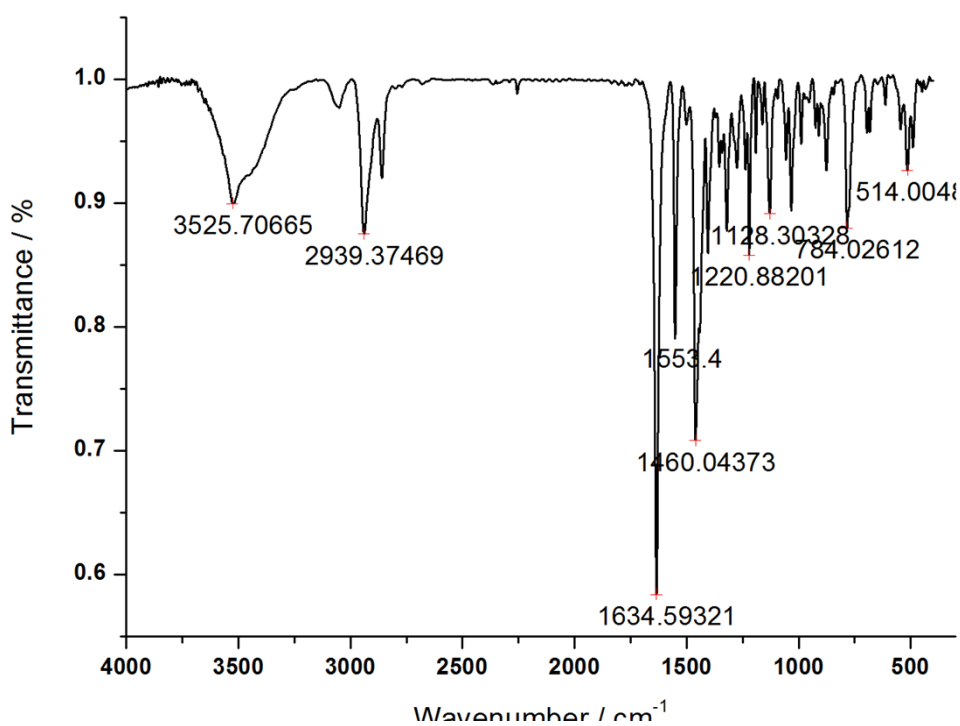

Fig. SI5. FT-IR spectrum of 3a.

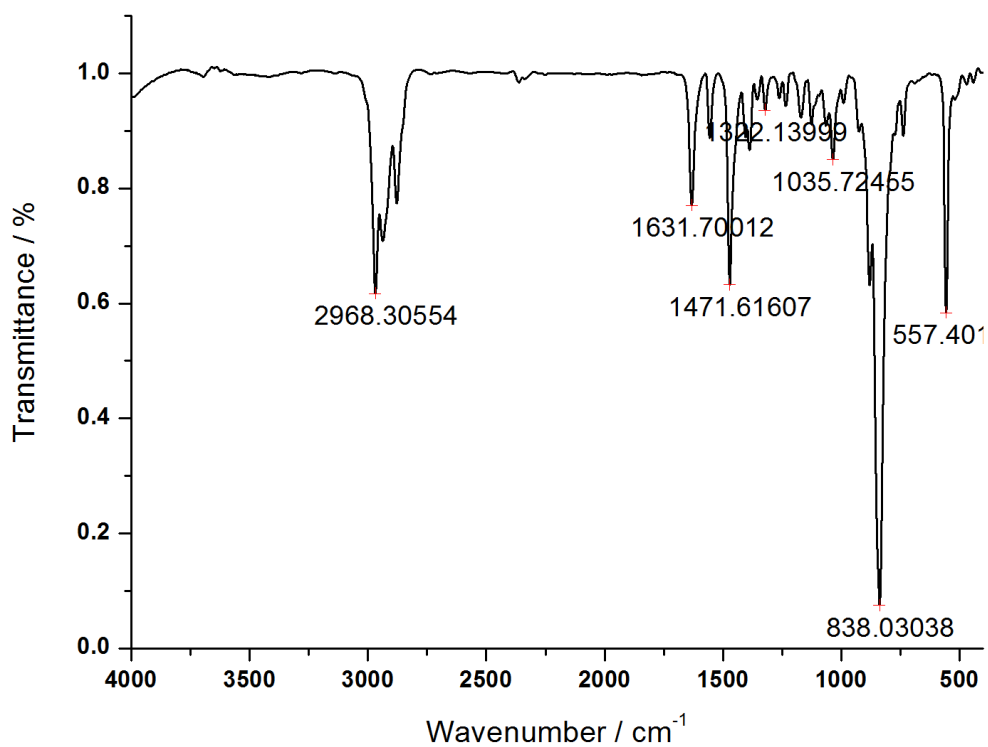

Fig. SI16. FT-IR spectrum of 3b.

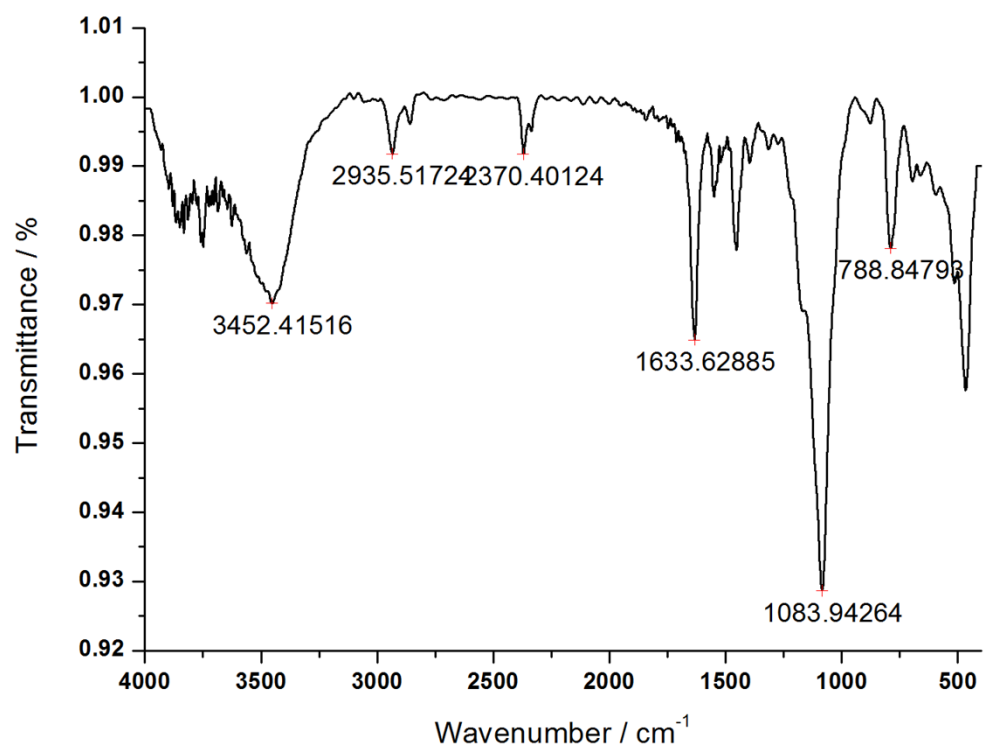

Fig. SI17. FT-IR spectrum of 4a.

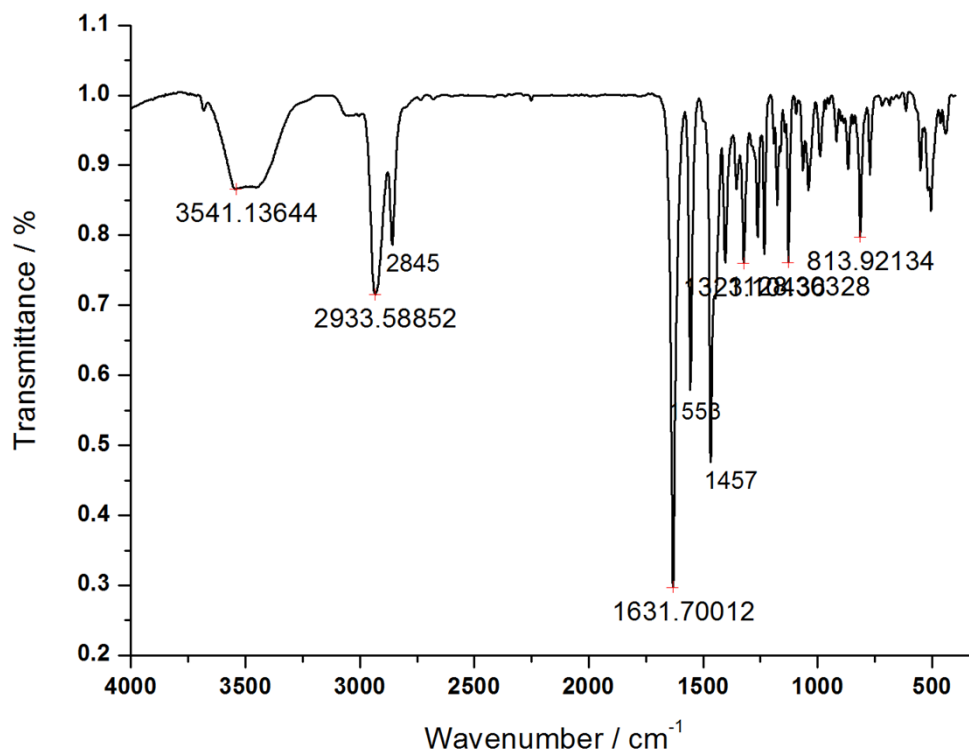

Fig. SI18. FT-IR spectrum of 4b.

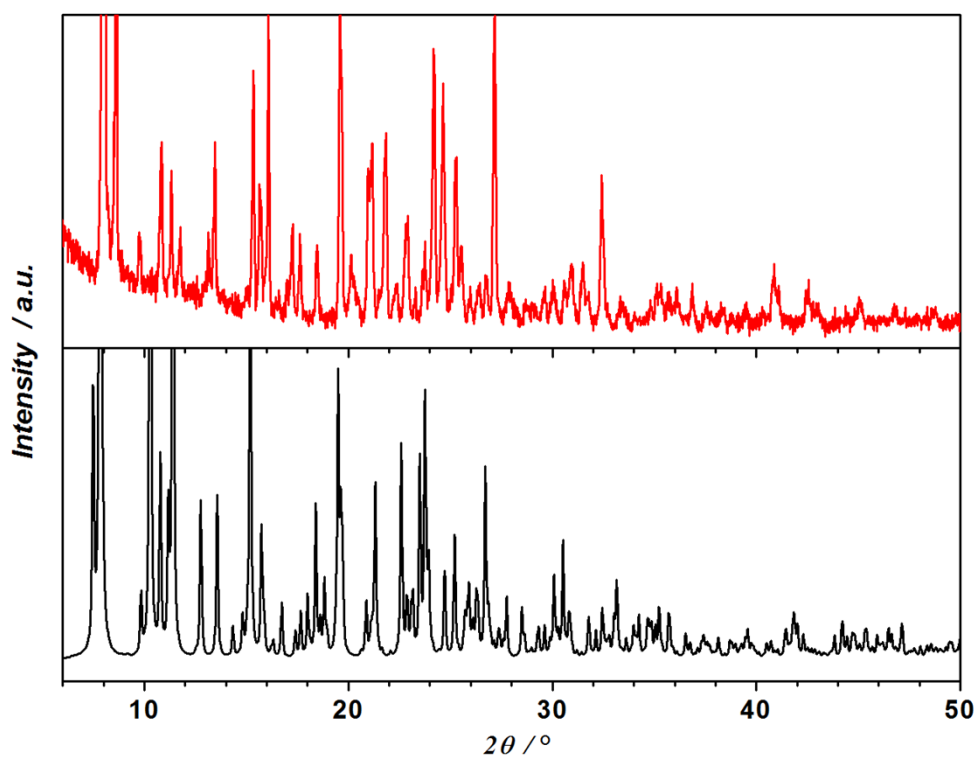

Fig. SI19. The simulative (black line) and experimental (red line) powder X-ray diffraction patterns for complex 2a.

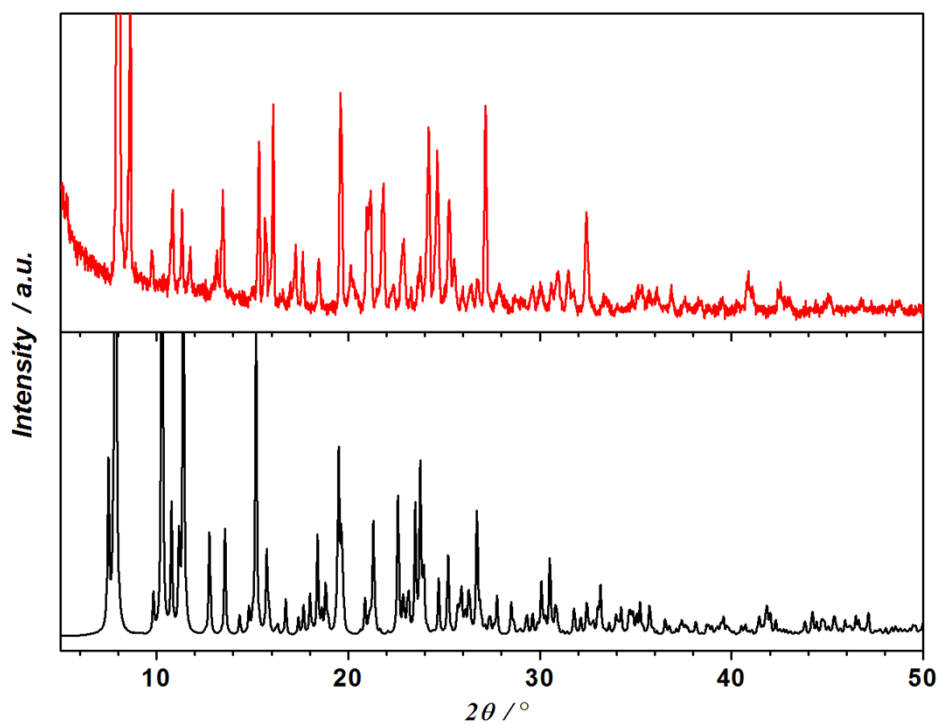

**Fig. S110.** The simulative (black line) and experimental (red line) powder X-ray diffraction patterns for complex **3a**.

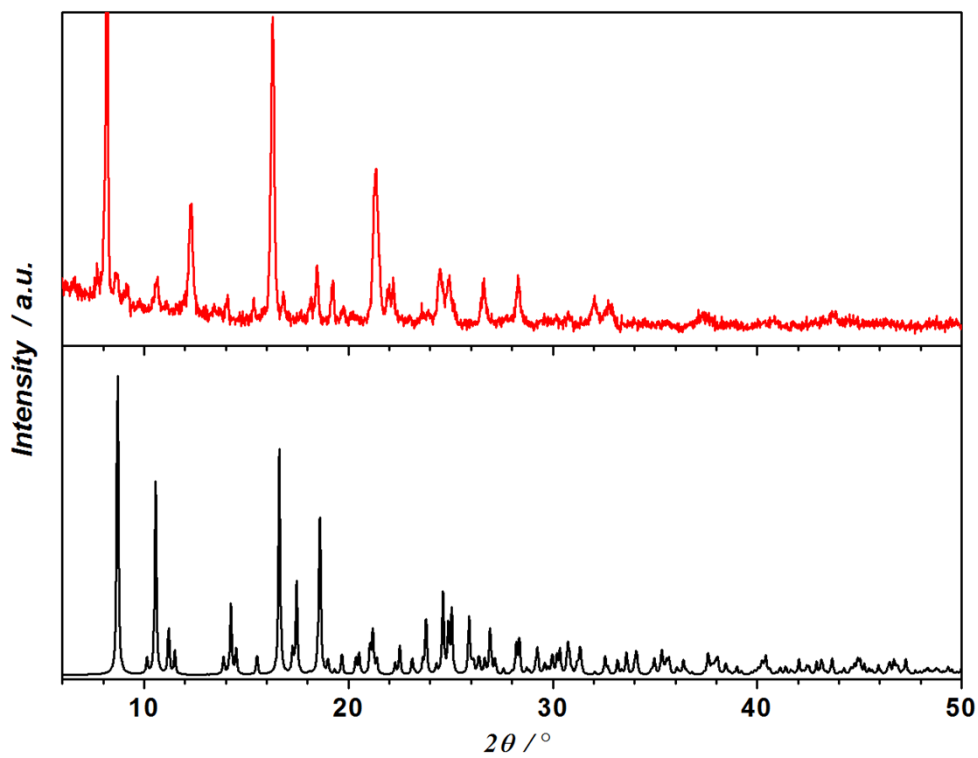

**Fig. S111.** The simulative (black line) and experimental (red line) powder X-ray diffraction patterns for complex **4a**.

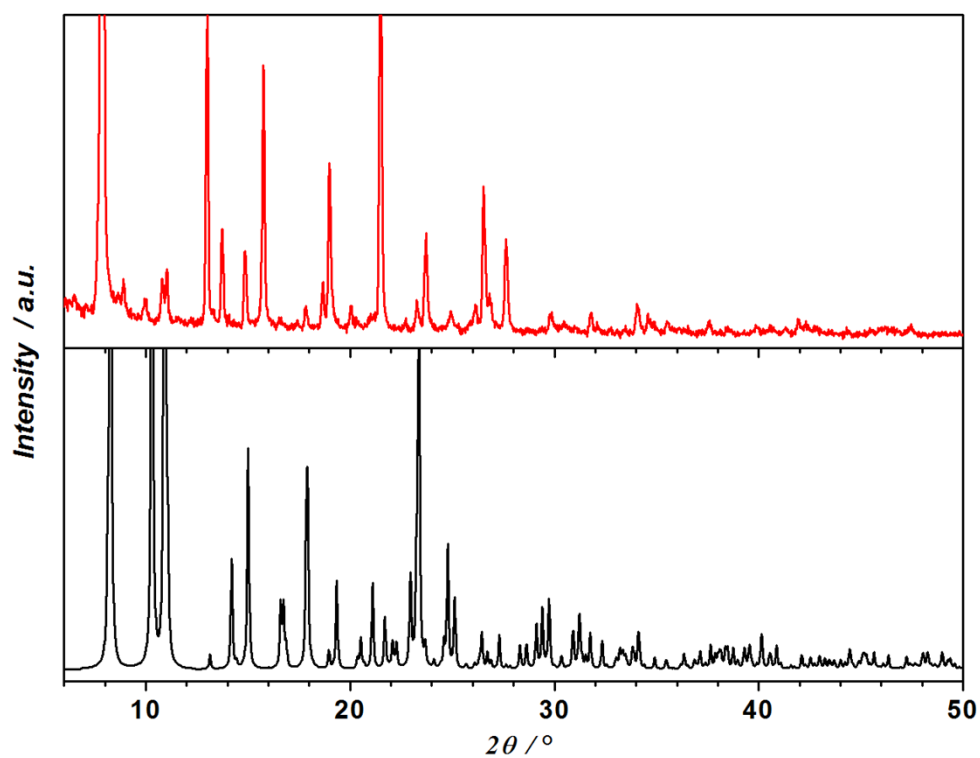

**Fig. SI12.** The simulative (black line) and experimental (red line) powder X-ray diffraction patterns for complex **2b**.

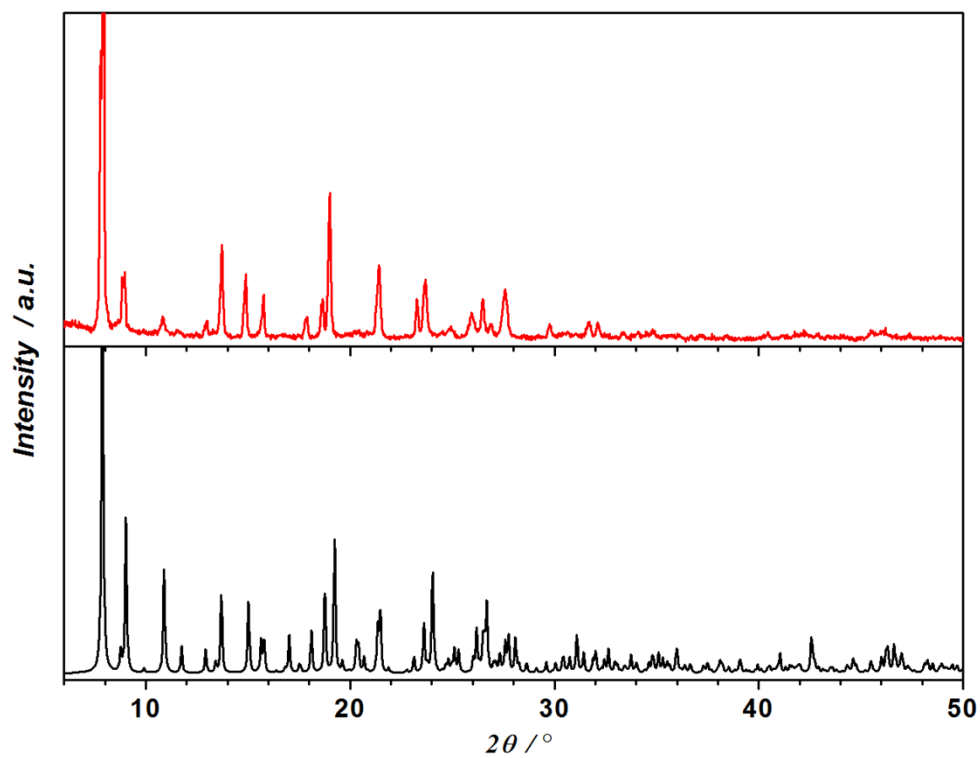

**Fig. SI13.** The simulative (black line) and experimental (red line) powder X-ray diffraction patterns for complex **3b**.

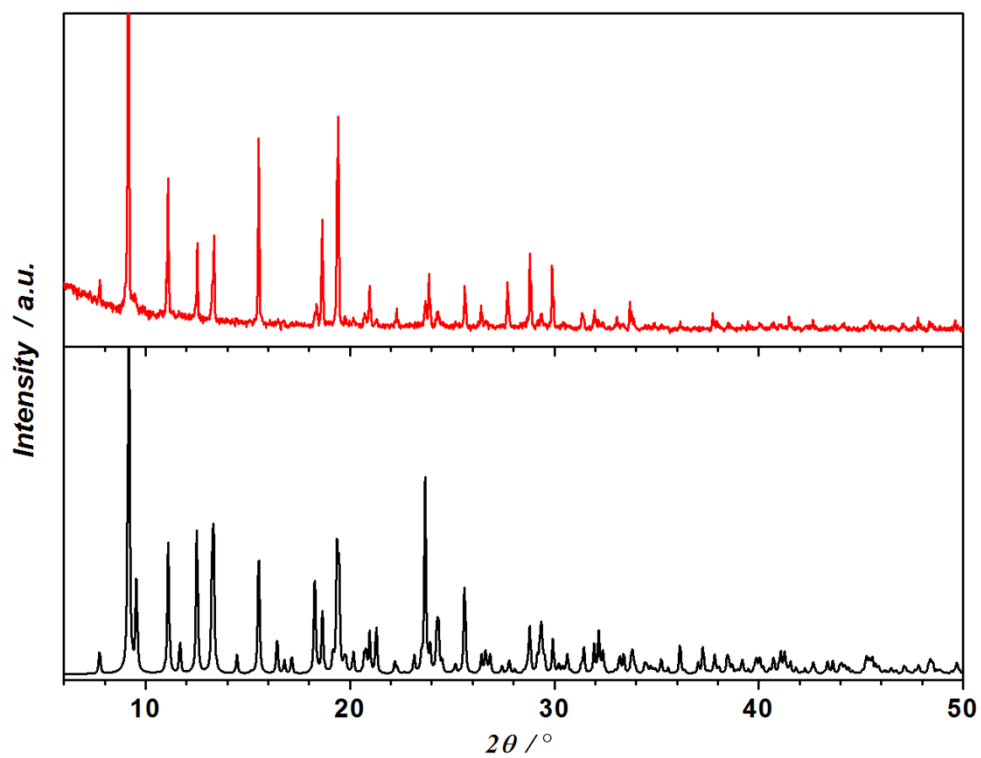

**Fig. SI14.** The simulative (black line) and experimental (red line) powder X-ray diffraction patterns for complex **4b**.
